# Supplementary material for: An inversion of magnetic field effects in electromer-based organic light-emitting diodes
Source: Royal Society of Chemistry journal article supplement (doi:10.1039/c8tc05571h), 2018-12-12
Supplement: c8tc05571h1.pdf [file c8tc05571h1.pdf]

## Supporting Information

### **An Inversion of Magnetic Field Effects in Electromer-Based Organic**

### **Light-Emitting Diodes**

Peisen Yuan,<sup>ab</sup> Xianfeng Qiao,<sup>c</sup> Donghang Yan,<sup>\*ab</sup> and Dongge Ma<sup>\*ac</sup>

a State Key Laboratory of Polymer Physics and Chemistry, Changchun Institute of Applied Chemistry, Changchun 130022, People's Republic of China

b University of Science and Technology of China, Hefei 230026, People's Republic of China

c Institute of Polymer Optoelectronic Materials and Devices, State Key Laboratory of Luminescent Materials and Devices, South China University of Technology, Guangzhou 510640, People's Republic of China

\* Corresponding Authors Dongge Ma ([msdgma@scut.edu.cn](mailto:msdgma@scut.edu.cn))

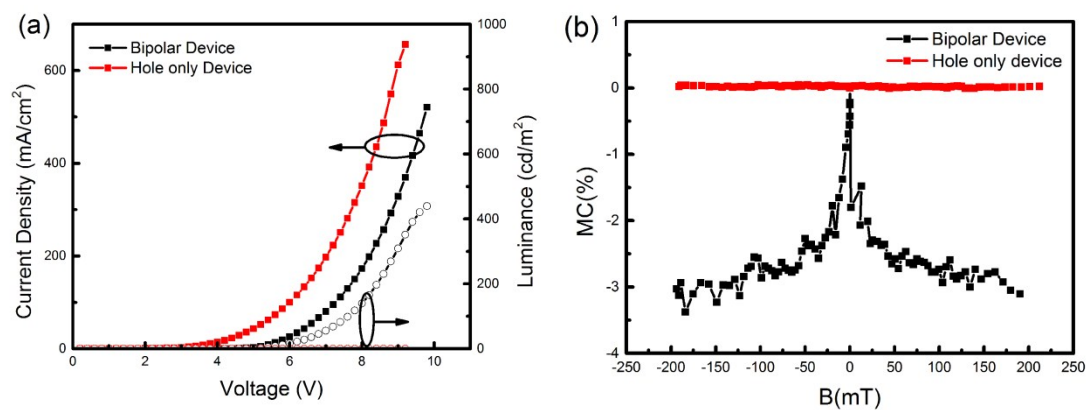

Fig. S1 (a) Current density-luminance-voltage characteristics of hole-only device and Device 1. (b) MC response characteristics of Bipolar Device and Hole-only device at 6 V.

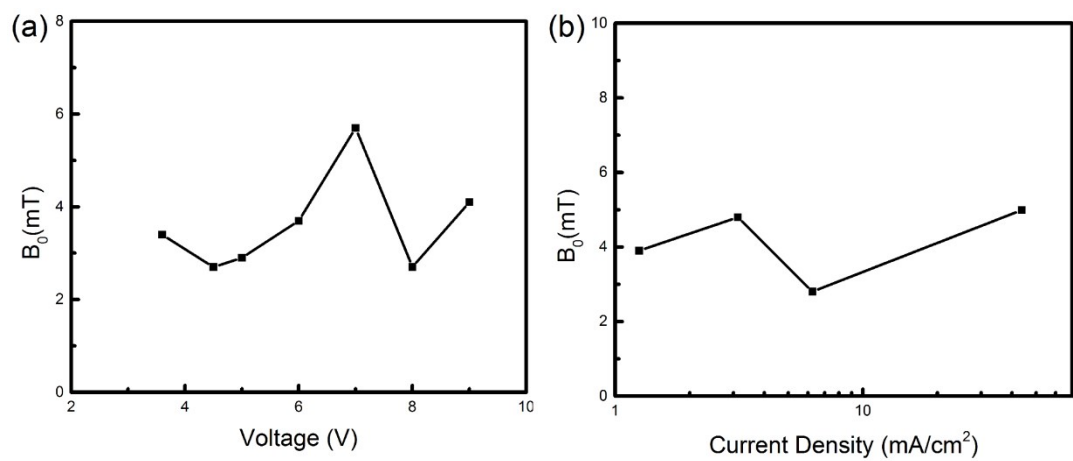

Fig. S2 The calculated  $B_0$  values of MC and MEL responses at different applied voltages (a) and currents (b) by the non-Lorentzian function.

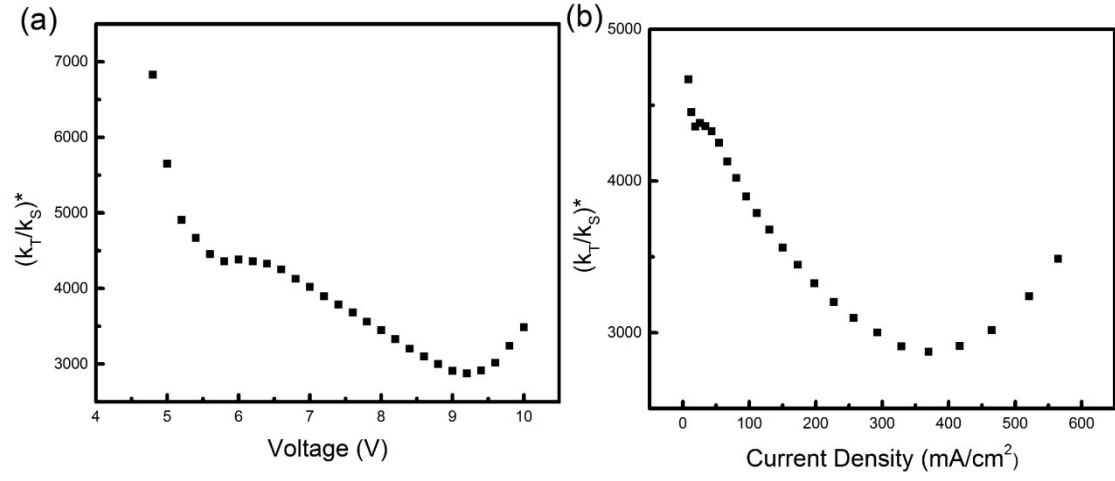

Fig. S3 (a) and (b) Values of  $(k_T/k_S)^*$  versus applied voltages and injected current from our experimental results, where  $(k_T/k_S)^* = 3(k_T/k_S)/\eta + 1/\eta$  and  $\eta$  is a constant.

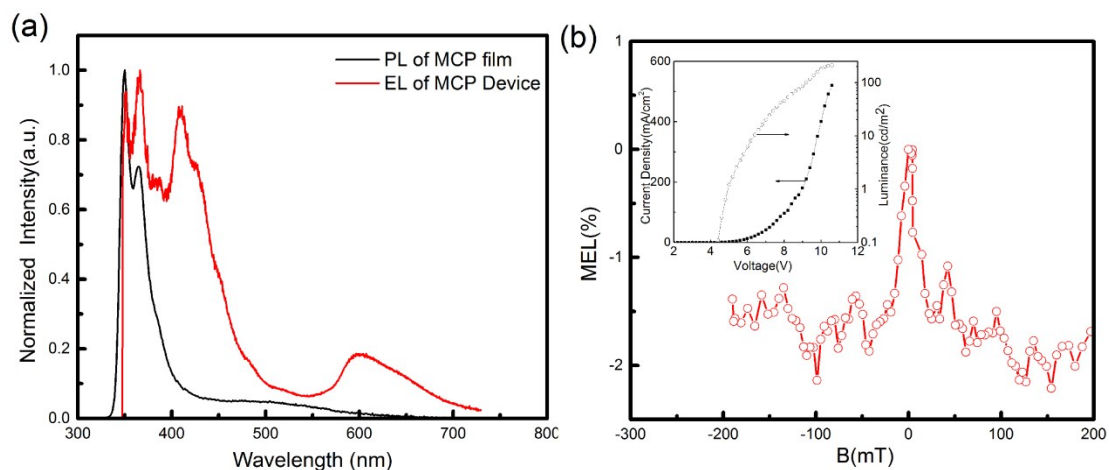

Fig. S4 (a) Normalized PL spectrum of MCP film and EL spectrum of MCP-based OLEDs with the structure of ITO/HAT-CN (10 nm)/MCP (70 nm)/CsCO<sub>3</sub> (1 nm)/Ca (10 nm)/Al (100nm). (b) MEL response characteristic of MCP-based device at a voltage of 6 V. The inset shows the current density-luminance-voltage characteristics of this device.
